# Supplementary material for: Genome-Wide Analysis of Copy Number Variation in Type 1 Diabetes
Source: PLoS One. 2010 Nov 15;5(11):e15393. doi: 10.1371/journal.pone.0015393 (PMC2981564; doi:10.1371/journal.pone.0015393)
Supplement: Table S2 — Comparisons of Birdsuite Copy Number Calls to qPCR calls. 185 unique gene region-sample comparisons were made between the copy number as determined by Birdsuite based on Affymetrix array data and copy number determined independent of the array by qPCR. (XLS) [file pone.0015393.s002.xls]

## Sheet: Sheet1
Location	Sample	Birdsuite Call	Confidence	qPCR call	Confidence
16p12	Ctrl 01	2	3100	2	> 0.99
16p12	Ctrl 02	2	3696	2	> 0.99
16p12	Ctrl 03	2	3699	2	> 0.99
16p12	Ctrl 04	2	3330	2	> 0.99
16p12	Ctrl 05	2	2361	2	> 0.99
16p12	Ctrl 06	2	3717	2	> 0.99
16p12	Ctrl 07	2	2749	2	> 0.99
16p12	Ctrl 08	2	3706	2	> 0.99
16p12	Ctrl 09	2	3699	2	> 0.99
16p12	Ctrl 10	2	3705	2	> 0.99
16p12	Ctrl 11	2	2361	2	> 0.99
16p12	Ctrl 12	2	3705	2	> 0.99
16p12	Ctrl 13	2	2367	2	> 0.99
16p12	Ctrl 14	2	3705	2	> 0.99
16p12	Ctrl 15	2	3417	2	> 0.99
16p12	Ctrl 16	2	3105	2	> 0.99
16p12	Ctrl 17	2	8303	2	> 0.99
16p12	Ctrl 18	2	3705	2	> 0.99
16p12	Ctrl 19	2	2492	2	> 0.99
16p12	T1D 01	2	3297	2	> 0.99
16p12	T1D 02	2	3298	2	> 0.99
16p12	T1D 03	2	3699	2	0.96
16p12	T1D 04	2	2374	2	> 0.99
16p12	T1D 05	2	3298	2	> 0.99
16p12	T1D 06	2	3708	2	> 0.99
16p12	T1D 07	2	3696	2	> 0.99
16p12	T1D 08	2	3727	2	> 0.99
16p12	T1D 09	2	3718	2	> 0.99
16p12	T1D 10	2	2375	2	> 0.99
16p12	T1D 11	2	3315	2	> 0.99
16p12	T1D 12	2	3315	2	0.99
16p12	T1D 13	2	3298	2	> 0.99
16p12	T1D 14	2	3713	2	> 0.99
16p12	T1D 15	2	2360	2	> 0.99
16p12	T1D 16	2	3311	2	> 0.99
16p12	T1D 17	2	2358	2	> 0.99
16p12	T1D 18	2	2895	2	> 0.99
15p13	Ctrl 01	2	4790	2	> 0.99
15p13	Ctrl 02	2	12742	2	0.98
15p13	Ctrl 03	2	22431	2	> 0.99
15p13	Ctrl 04	2	7872	2	> 0.99
15p13	Ctrl 05	2	19067	2	0.99
15p13	Ctrl 06	2	15333	2	0.94
15p13	Ctrl 07	2	29305	2	> 0.99
15p13	Ctrl 08	1	46.84	1	> 0.99
15p13	Ctrl 09	2	28204	2	> 0.99
15p13	Ctrl 10	2	17713	2	0.99
15p13	Ctrl 11	2	28422	2	> 0.99
15p13	Ctrl 12	2	7743	2	0.98
15p13	Ctrl 13	2	12381	2	0.91
15p13	Ctrl 14	2	26651	2	0.97
15p13	Ctrl 15	2	12065	2	> 0.99
15p13	Ctrl 16	2	11780	2	> 0.99
15p13	Ctrl 17	2	15664	2	> 0.99
15p13	Ctrl 18	2	10	2	> 0.99
15p13	Ctrl 19	2	6284	2	> 0.99
15p13	T1D 01	2	10815	2	0.97
15p13	T1D 02	1	10	1	0.74
15p13	T1D 03	2	15963	2	0.88
15p13	T1D 04	2	13384	2	0.87
15p13	T1D 05	2	9967	2	0.97
15p13	T1D 06	1	10	1	> 0.99
15p13	T1D 07	2	33066	2	0.98
15p13	T1D 08	2	30471	2	0.95
15p13	T1D 09	2	13392	2	0.95
15p13	T1D 10	2	2282	2	0.97
15p13	T1D 11	2	11903	2	0.94
15p13	T1D 12	2	20369	2	0.97
15p13	T1D 13	2	4950	2	0.96
15p13	T1D 14	2	14544	1	< 0.50
15p13	T1D 15	2	12682	2	0.97
15p13	T1D 16	2	14956	2	0.7
15p13	T1D 17	2	4673	2	0.9
15p13	T1D 18	1	54.17	1	> 0.99
8q24	Ctrl 01	1	10	1	0.97
8q24	Ctrl 02	2	3709	2	0.77
8q24	Ctrl 03	1	10	1	> 0.99
8q24	Ctrl 04	2	5237	2	0.96
8q24	Ctrl 05	1	10	1	0.99
8q24	Ctrl 06	2	7699	2	0.98
8q24	Ctrl 07	0	10	0	n/a
8q24	Ctrl 08	2	2677	2	0.9
8q24	Ctrl 09	2	2677	2	0.97
8q24	Ctrl 10	2	10578	2	0.97
8q24	Ctrl 11	2	4372	2	0.98
8q24	Ctrl 12	2	8005	2	0.98
8q24	Ctrl 13	1	10	1	0.96
8q24	Ctrl 14	0	10	0	n/a
8q24	Ctrl 15	1	10	1	> 0.99
8q24	Ctrl 16	2	2809	2	0.98
8q24	Ctrl 17	2	2318	2	0.9
8q24	Ctrl 18	2	22957	2	0.96
8q24	Ctrl 19	2	3333	2	0.98
8q24	T1D 01	2	84.01	2	0.91
8q24	T1D 02	2	1902	2	0.97
8q24	T1D 03	1	10	1	> 0.99
8q24	T1D 04	2	9195	2	0.95
8q24	T1D 05	2	5125	2	0.78
8q24	T1D 06	2	9039	2	0.93
8q24	T1D 07	2	22957	2	0.91
8q24	T1D 08	2	1812	2	0.98
8q24	T1D 09	1	10	1	> 0.99
8q24	T1D 10	2	2211	1	> 0.99
8q24	T1D 11	2	13001	2	0.92
8q24	T1D 12	2	367.94	2	0.96
8q24	T1D 13	2	2658	2	0.79
8q24	T1D 14	2	5044	1	< 0.50
8q24	T1D 15	2	2064	2	0.84
8q24	T1D 16	1	10	1	> 0.99
8q24	T1D 17	1	10	1	0.94
8q24	T1D 18	2	2266	1	0.58
8q11	Ctrl 01	2	5498	2	0.96
8q11	Ctrl 02	1	10	1	> 0.99
8q11	Ctrl 03	2	17916	2	0.99
8q11	Ctrl 04	2	39276	2	0.99
8q11	Ctrl 05	2	13396	2	0.97
8q11	Ctrl 06	2	7497	2	0.99
8q11	Ctrl 07	2	15273	2	0.99
8q11	Ctrl 08	1	10	1	> 0.99
8q11	Ctrl 09	2	11072	2	0.99
8q11	Ctrl 10	2	32664	2	0.98
8q11	Ctrl 11	2	14202	2	> 0.99
8q11	Ctrl 12	2	16238	2	> 0.99
8q11	Ctrl 13	1	10	1	0.99
8q11	Ctrl 14	2	17914	2	0.99
8q11	Ctrl 15	1	10	1	0.97
8q11	Ctrl 16	2	16801	2	0.95
8q11	Ctrl 17	2	2214	2	0.92
8q11	Ctrl 18	2	12601	2	> 0.99
8q11	Ctrl 19	2	9013	2	> 0.99
8q11	T1D 01	2	13061	2	0.97
8q11	T1D 02	1	10	1	> 0.99
8q11	T1D 03	2	10	1	0.99
8q11	T1D 04	2	12104	2	> 0.99
8q11	T1D 05	1	10	1	> 0.99
8q11	T1D 06	2	18344	2	> 0.99
8q11	T1D 07	0	10	0	n/a
8q11	T1D 08	2	17916	2	> 0.99
8q11	T1D 09	1	10	1	> 0.99
8q11	T1D 10	2	1314	2	> 0.99
8q11	T1D 11	1	10	1	> 0.99
8q11	T1D 12	1	10	1	> 0.99
8q11	T1D 13	1	10	1	> 0.99
8q11	T1D 14	1	10	1	> 0.99
8q11	T1D 15	2	33014	2	> 0.99
8q11	T1D 16	1	10	1	> 0.99
8q11	T1D 17	1	10	1	> 0.99
8q11	T1D 18	1	10	1	> 0.99
7q33	Ctrl 01	1	10	1	> 0.99
7q33	Ctrl 02	1	10	1	> 0.99
7q33	Ctrl 03	2	9920	2	> 0.99
7q33	Ctrl 04	2	10565	2	> 0.99
7q33	Ctrl 05	2	10131	2	> 0.99
7q33	Ctrl 06	2	10159	2	> 0.99
7q33	Ctrl 07	2	10565	2	> 0.99
7q33	Ctrl 08	2	5803	2	> 0.99
7q33	Ctrl 09	1	10	1	> 0.99
7q33	Ctrl 10	2	7114	2	> 0.99
7q33	Ctrl 11	1	10.14	1	> 0.99
7q33	Ctrl 12	2	10559	2	0.94
7q33	Ctrl 13	2	10159	3	< 0.50
7q33	Ctrl 14	0	10	0	n/a
7q33	Ctrl 15	2	6560	2	0.94
7q33	Ctrl 16	2	14090	2	0.97
7q33	Ctrl 17	1	10	1	> 0.99
7q33	Ctrl 18	1	10	1	> 0.99
7q33	Ctrl 19	2	6334	2	> 0.99
7q33	T1D 01	1	10	1	> 0.99
7q33	T1D 02	0	10	0	n/a
7q33	T1D 03	1	10	1	0.96
7q33	T1D 04	2	8641	2	0.85
7q33	T1D 05	1	10	1	0.98
7q33	T1D 06	1	10	1	0.99
7q33	T1D 07	1	10	1	0.99
7q33	T1D 08	1	10	1	> 0.99
7q33	T1D 09	2	9897	2	0.63
7q33	T1D 10	1	10	1	0.94
7q33	T1D 11	2	4153	1	< 0.50
7q33	T1D 12	1	10	1	0.97
7q33	T1D 13	1	10	1	0.99
7q33	T1D 14	1	10	1	> 0.99
7q33	T1D 15	1	10	1	> 0.99
7q33	T1D 16	2	8659	2	< 0.50
7q33	T1D 17	1	10	1	> 0.99
7q33	T1D 18	0	10	0	n/a
